# Supplementary material for: Magnesium hydroxide nanoplate/graphene oxide composites as efficient adsorbents for organic dyes
Source: Royal Society of Chemistry journal article supplement (doi:10.1039/c5ra11184f), 2015-01-01
Supplement: c5ra11184f1.pdf [file c5ra11184f1.pdf]

# Supporting Information

## **Magnesium hydroxide nanoplates/graphene oxide composites as efficient adsorbents for organic dyes**

*Ju Ran Lee,<sup>a</sup> Ji Young Bae,<sup>b</sup> Woori Jang,<sup>a</sup> Joong-Hee Lee,<sup>c</sup> Won San Choi,<sup>\*b</sup> and Hye*

*Young Koo<sup>\*a</sup>*

**The calculation of the adsorption capacity.**

20 mg of the  $\text{Mg}(\text{OH})_2/\text{GO}$  composites were added on the 20 ML of MB solution (10 mg/L) and stirred. During the stirring, 1.5 mL of the resulting solution is sampled and measured its Uv-vis spectrum. After finishing the uv-vis measurement, the sampled solution is re-added in the mixture solution. The sampling-measurement is repeated at regular intervals until the uv-vis spectrum doesn't show any MB absorbance.

The adsorption capacity of the  $\text{Mg}(\text{OH})_2/\text{GO}$  composites were calculated on the basis of the absorbance ratio of the MB at 664 nm and the molar absorption coefficient of MB by using Beer-Lambert's law.

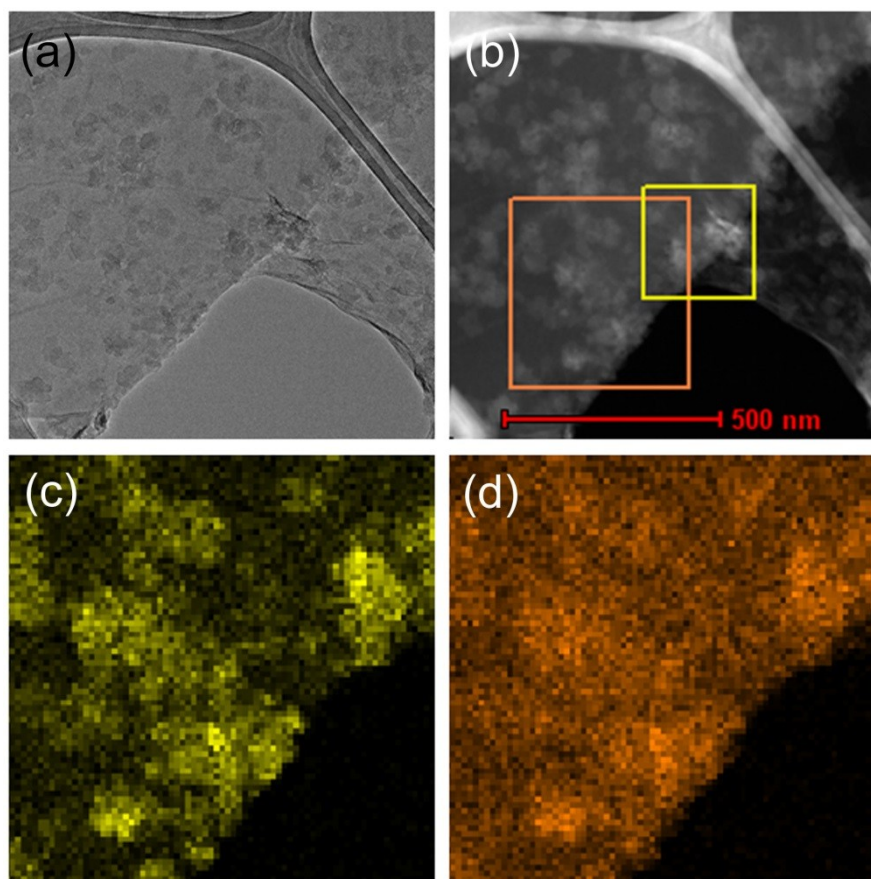

**Fig.S1.** Elemental mapping image of the  $\text{Mg}(\text{OH})_2/\text{GO}$ ; (a) bright field mode TEM, (b) dark field mode STEM, (c) the elemental distribution of Mg from the selected area of (b), (d) the elemental distribution of O from the selected area of (b).

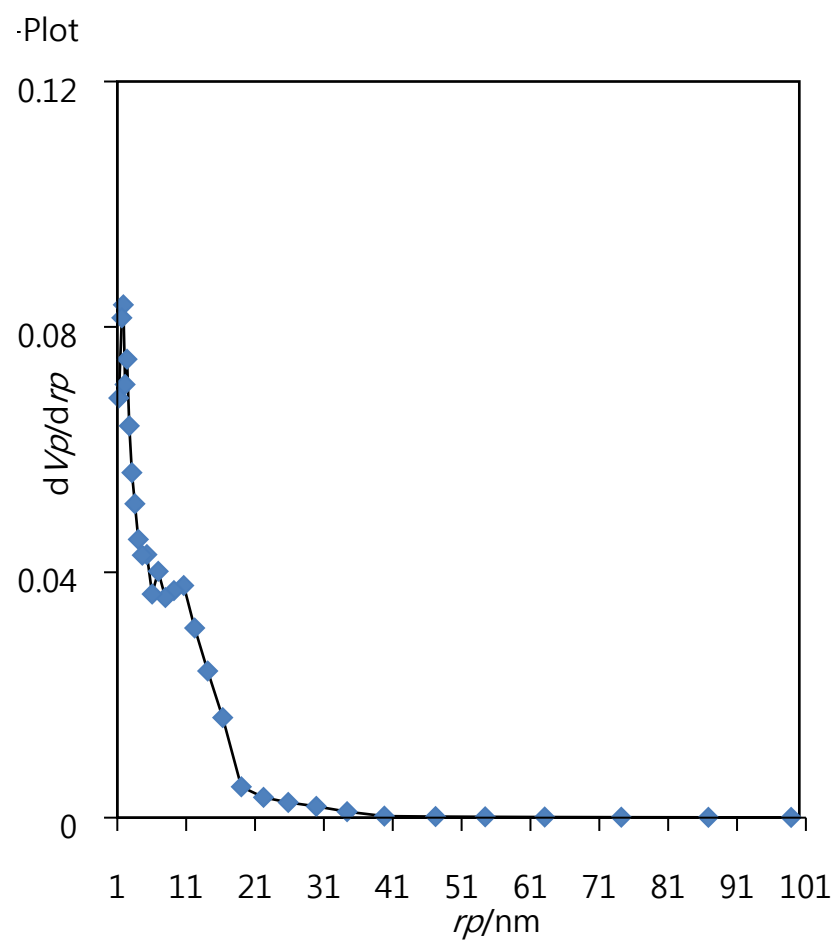

**Fig.S2.** Pore size distribution curve for Fig.4(a), showing average pore diameter of 9.9 nm.

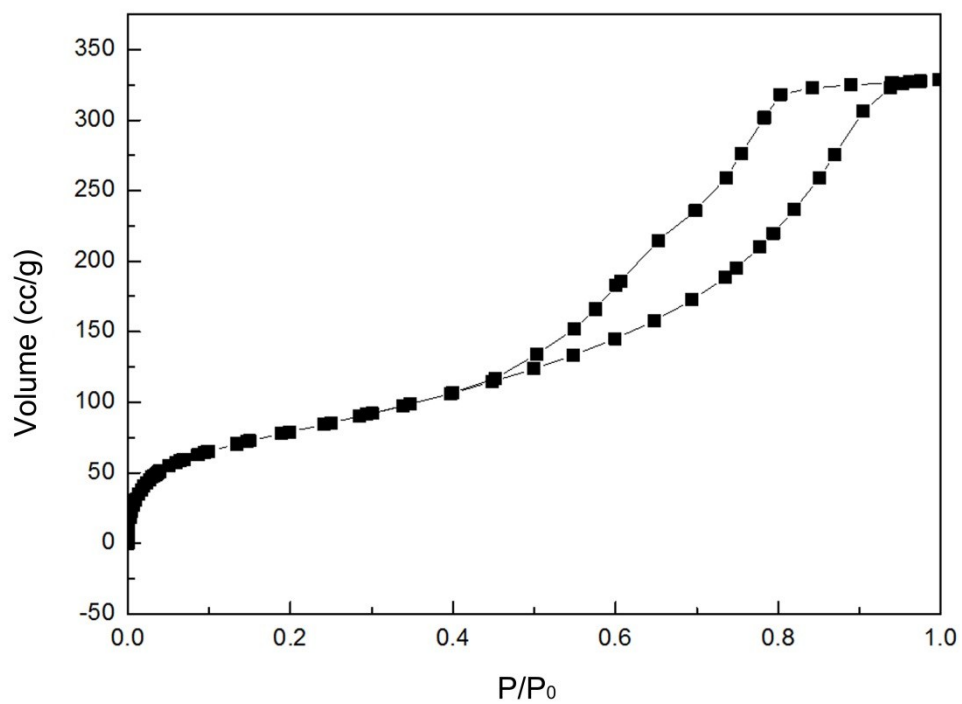

| BET plot                                       |  |  |                                                 |  |
|------------------------------------------------|--|--|-------------------------------------------------|--|
| V <sub>m</sub>                                 |  |  | 66.764 [cm <sup>3</sup> (STP) g <sup>-1</sup> ] |  |
| a <sub>s,BET</sub>                             |  |  | 290.59 [m <sup>2</sup> g <sup>-1</sup> ]        |  |
| C                                              |  |  | 68.243                                          |  |
| Total pore volume(p/p <sub>0</sub> =0.99<br>0) |  |  | 0.5078 [cm <sup>3</sup> g <sup>-1</sup> ]       |  |
| Average pore diameter                          |  |  | 6.99 [nm]                                       |  |

**Fig.S3.** N<sub>2</sub> adsorption-desorption curve for Mg(OH)<sub>2</sub> and the BET surface area of the Mg(OH)<sub>2</sub>.

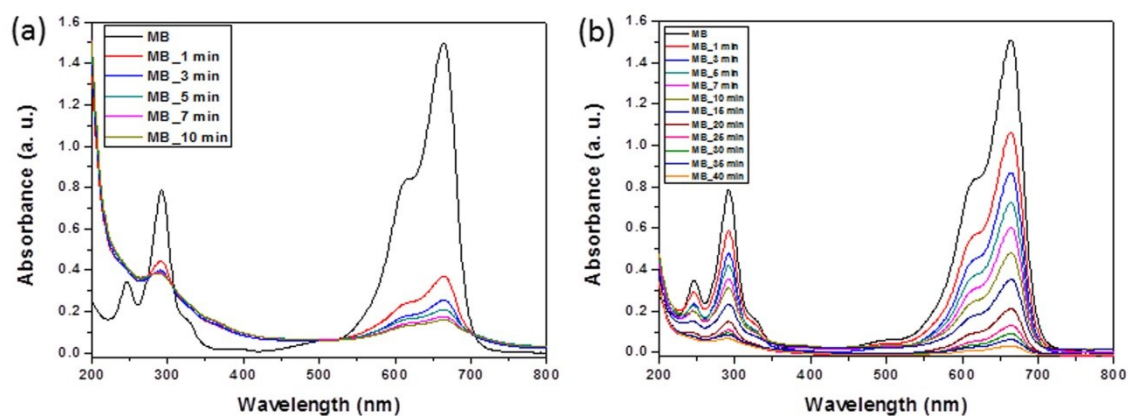

| Amount of magnesium nitrate precursor (mL) | $\Sigma (A_0 - A_s)$ | $C_{total} \text{ (mol/L)}$ | $V_{MB} \text{ (mL)}$ | adsorption capacity (mg/g) |
|--------------------------------------------|----------------------|-----------------------------|-----------------------|----------------------------|
| 5 mL                                       | 1.333565             | $1.4 \times 10^{-5}$        | 0.02 mL               | 5.25                       |
| 20 mL                                      | 11.55074             | $1.21 \times 10^{-4}$       | 0.16 mL               | 363.69                     |
| 100 mL                                     | 16.50113             | $1.74 \times 10^{-4}$       | 0.24 mL               | 779.34                     |

**Fig.S4.** Uv-vis absorption spectra for MB solution before and after treatment with  $\text{Mg}(\text{OH})_2/\text{GO}$  composites prepared by using magnesium nitrate precursor of (a) 5 mL, (b) 20 mL. The following table shows difference in the adsorption capacity of the  $\text{Mg}(\text{OH})_2/\text{GO}$  composites showing tunability according to the amount of precursor.

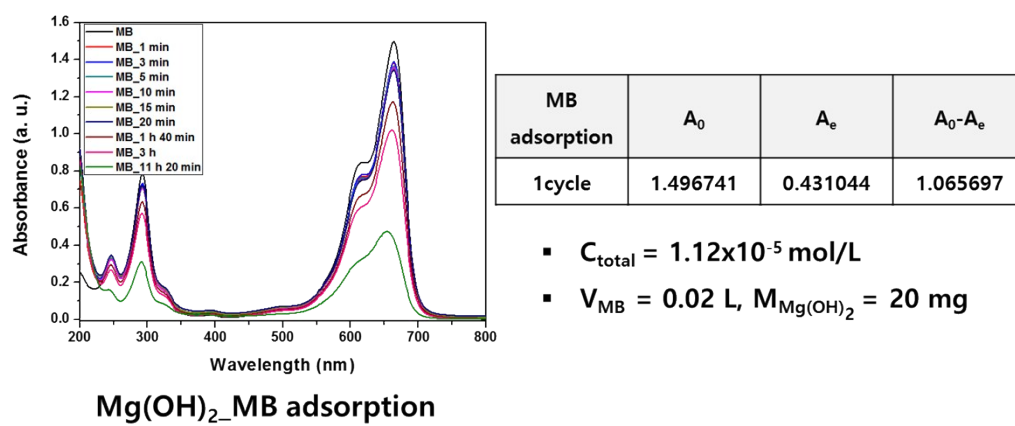

**Fig.S5.** Uv-vis absorption spectra for MB solution upon treatment with pristine Mg(OH)<sub>2</sub>.

The adsorption capacity is calculated as 4.19 mg/g.

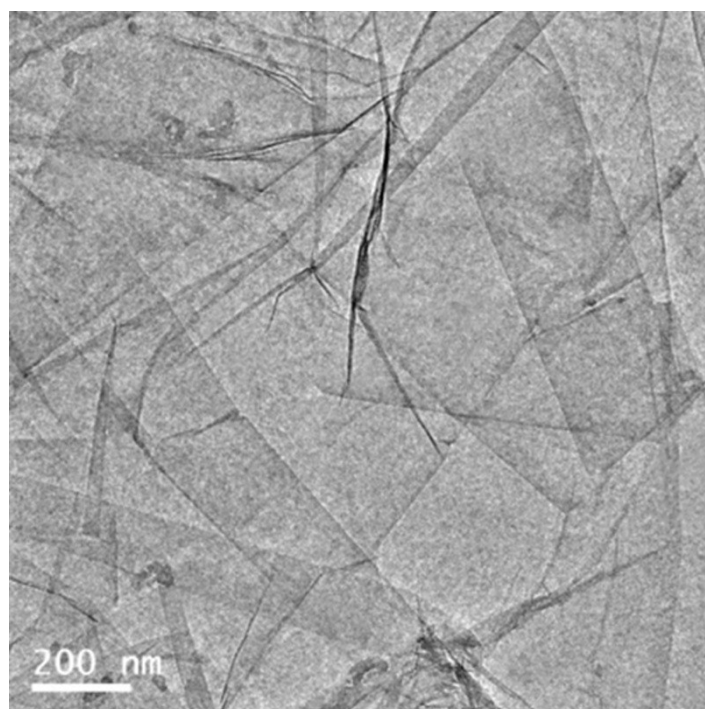

**Fig.S6.** TEM image of the GOs used in this work.



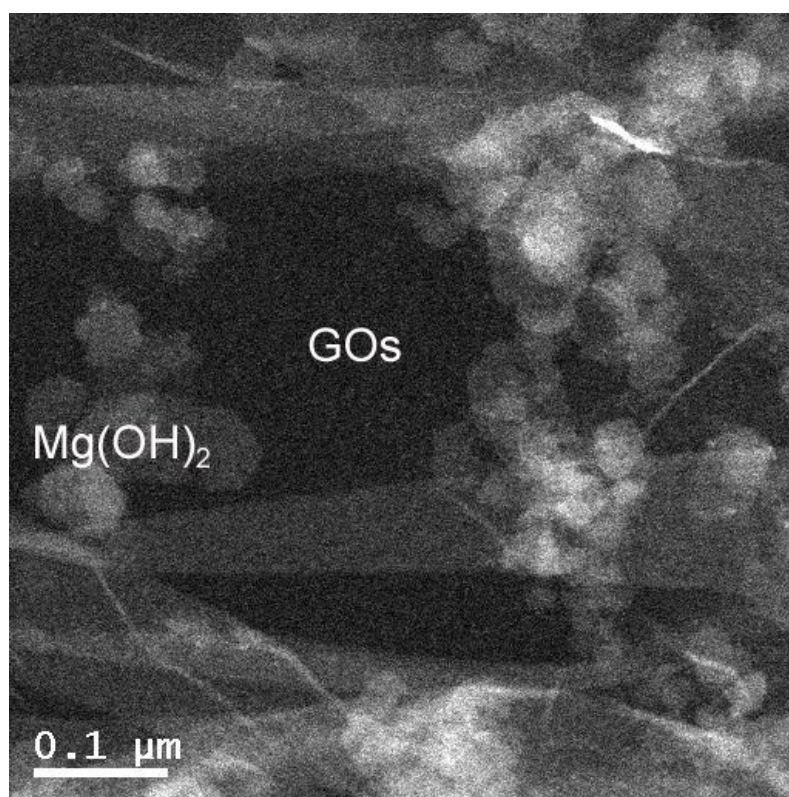

**Fig.S7.** Dark-field STEM image of the Mg(OH)<sub>2</sub>/GO composite showing Mg(OH)<sub>2</sub> nanoplates distributed in the GO microsheets.
